# Supplementary material for: Home Spirometry in Children with Cystic Fibrosis
Source: MDPI journal article supplement (doi:10.3390/bioengineering10020242), 2023-02-11
Supplement: s1 [file s1]

### Home Spirometry Initiation Visit Checklist

| Education Checklist for MIR Spirobank Smart spirometer: |                                                                                                                                                                                                                                                                                                                                                                                                                                                                     |
|---------------------------------------------------------|---------------------------------------------------------------------------------------------------------------------------------------------------------------------------------------------------------------------------------------------------------------------------------------------------------------------------------------------------------------------------------------------------------------------------------------------------------------------|
|                                                         | Identify if patient is well and if there is an adult present if the patient is a minor. If sick, reschedule Home Initiation and instruct caregiver to call the Pulmonary office.                                                                                                                                                                                                                                                                                    |
|                                                         | Inform that device is single person use (don't have everyone try it)                                                                                                                                                                                                                                                                                                                                                                                                |
|                                                         | Review warranty and no replacement available if broken or lost (emphasize care)                                                                                                                                                                                                                                                                                                                                                                                     |
|                                                         | Instruct on putting device together (batteries, etc.)                                                                                                                                                                                                                                                                                                                                                                                                               |
|                                                         | Download ZephyRX Breathe Easy APP or make sure the APP is updated.                                                                                                                                                                                                                                                                                                                                                                                                  |
|                                                         | Review device set up and creating user profile. If existing, ensure current height in profile                                                                                                                                                                                                                                                                                                                                                                       |
|                                                         | Do not block turbine. No moving overhead fan during test.                                                                                                                                                                                                                                                                                                                                                                                                           |
|                                                         | Teach technique.                                                                                                                                                                                                                                                                                                                                                                                                                                                    |
|                                                         | Discuss how to email the data.                                                                                                                                                                                                                                                                                                                                                                                                                                      |
|                                                         | Teach device cleaning and disinfecting. Nose clips: alcohol swab<br>Remove batteries when storing.                                                                                                                                                                                                                                                                                                                                                                  |
|                                                         | Emphasize not to run water through turbine.                                                                                                                                                                                                                                                                                                                                                                                                                         |
|                                                         | Who to contact for troubleshooting or future questions: <b>Pulmonary Lab</b>                                                                                                                                                                                                                                                                                                                                                                                        |
|                                                         | Discuss protocol for patient use (5 days initially, sick visits, and always bring to clinic)<br>Start day one tomorrow (measure height).                                                                                                                                                                                                                                                                                                                            |
|                                                         | Instruct how to use measuring tape to obtain height. (Show patient's last height.) _____ <ul style="list-style-type: none"> <li>• Hard floor area to sticker it to the wall? Stand in middle, feet together, heels back against wall, relaxed hands to sides.</li> <li>• 12-in ruler. Stabilize against wall. Top of ear opening and across occipital bone.</li> <li>• Don't move. Lay ruler flat across top of head and line up to the measuring point.</li> </ul> |
| Other?<br>Questions?                                    | Graph:                                                                                                                                                                                                                                                                                                                                                                                                                                                              |

Meeting Participants: \_\_\_\_\_
